# Supplementary material for: Azido-mediated intermolecular interactions of transition metal complexes
Source: Royal Society of Chemistry journal article supplement (doi:10.1039/d3cp05798d), 2024-01-01
Supplement: d3cp05798d1.pdf [file d3cp05798d1.pdf]

## **Azido-mediated intermolecular interactions of transition metal complexes**

Juan D. Velasquez,<sup>a</sup> Jorge Echeverría<sup>a,\*</sup> Célia Fonseca Guerra<sup>b\*</sup> and Santiago Alvarez<sup>c\*</sup>

<sup>a</sup>Instituto de Síntesis Química y Catálisis Homogénea, Facultad de Ciencias, Universidad de Zaragoza, Pedro Cerbuna 12, 50009 Zaragoza (Spain). Email: jorge.echeverria@unizar.es

<sup>b</sup>Department of Chemistry and Pharmaceutical Sciences, AIMMS, Vrije Universiteit Amsterdam, De Boelelaan 1083, 1081HV Amsterdam (The Netherlands). Email: c.fonsecaguerra@vu.nl

<sup>c</sup>Departament de Química Inorgànica i Orgànica and Institut de Química Teòrica i Computacional (IQTIC-UB), Universitat de Barcelona, Martí i Franquès 1-11, 08028 Barcelona (Spain). Email: santiago@qi.ub.es

### **SUPPORTING INFORMATION**

**Table S1.** Cartesian coordinates of gas phase optimized dimers of [N<sub>3</sub>-Hg(CF<sub>3</sub>)] with different topologies and torsion angles  $\tau$ .

**1a**

|    |            |            |            |
|----|------------|------------|------------|
| N  | 0.0000000  | 0.0000000  | 0.0000000  |
| N  | 0.0000000  | 0.0000000  | 1.1237490  |
| N  | 0.1049310  | 0.0000000  | 2.3363450  |
| Hg | -1.5312370 | -0.0009390 | 3.5517280  |
| C  | -3.1160370 | -0.0024880 | 4.9223830  |
| F  | -2.6955320 | -0.2422630 | 6.1713440  |
| F  | -4.0273340 | -0.9395310 | 4.6311360  |
| F  | -3.7595580 | 1.1716150  | 4.9467080  |
| N  | 3.1554860  | 0.0016580  | 2.0723670  |
| N  | 3.2604170  | 0.0016580  | 3.2849630  |
| N  | 3.2604170  | 0.0015530  | 4.4087120  |
| Hg | 4.7916540  | 0.0025970  | 0.8569840  |
| C  | 6.3764540  | 0.0028860  | -0.5136710 |
| F  | 5.9562080  | -0.2372270 | -1.7626540 |
| F  | 7.2887610  | -0.9332010 | -0.2225120 |
| F  | 7.0187090  | 1.1776840  | -0.5378870 |

**1b**

|    |            |            |            |
|----|------------|------------|------------|
| N  | 0.0000000  | 0.0000000  | 0.0000000  |
| N  | 0.0000000  | 0.0000000  | 1.1237490  |
| N  | 0.1049310  | 0.0000000  | 2.3363450  |
| Hg | -1.5312370 | -0.0009390 | 3.5517280  |
| C  | -3.1160370 | -0.0024880 | 4.9223830  |
| F  | -2.6955320 | -0.2422630 | 6.1713440  |
| F  | -4.0273340 | -0.9395310 | 4.6311360  |
| F  | -3.7595580 | 1.1716150  | 4.9467080  |
| N  | 3.1757440  | 0.0016690  | 2.0706140  |
| N  | 3.2806750  | 0.0016690  | 3.2832100  |
| N  | 3.3773000  | -0.0952120 | 4.3985970  |
| Hg | 3.0825780  | 1.7365260  | 1.0048780  |
| C  | 2.9763430  | 3.4335930  | -0.2194440 |
| F  | 3.1051610  | 3.1225890  | -1.5159410 |
| F  | 3.9407330  | 4.3174020  | 0.0672080  |
| F  | 1.8086120  | 4.0755440  | -0.0870340 |

**2a**

|    |            |            |           |
|----|------------|------------|-----------|
| N  | 0.0000000  | 0.0000000  | 0.0000000 |
| N  | 0.0000000  | 0.0000000  | 1.1237490 |
| N  | 0.1049310  | 0.0000000  | 2.3363450 |
| Hg | -1.5312370 | -0.0009390 | 3.5517280 |
| C  | -3.1160370 | -0.0024880 | 4.9223830 |
| F  | -2.6955310 | -0.2422630 | 6.1713440 |
| F  | -4.0273340 | -0.9395310 | 4.6311360 |

|    |            |            |           |
|----|------------|------------|-----------|
| F  | -3.7595580 | 1.1716150  | 4.9467080 |
| N  | 2.4343730  | 0.0011800  | 3.9707280 |
| N  | 3.0897930  | 0.0015820  | 2.9451430 |
| N  | 1.7498560  | 0.0007170  | 4.8619330 |
| Hg | 5.1277160  | 0.0026790  | 2.9779160 |
| C  | 7.2194820  | 0.0031830  | 2.8562580 |
| F  | 7.6470210  | -0.2364720 | 1.6096640 |
| F  | 7.7657230  | -0.9331240 | 3.6425690 |
| F  | 7.7434840  | 1.1779000  | 3.2286710 |

**2b**

|    |            |            |           |
|----|------------|------------|-----------|
| N  | 0.0000000  | 0.0000000  | 0.0000000 |
| N  | 0.0000000  | 0.0000000  | 1.1237490 |
| N  | 0.1049310  | 0.0000000  | 2.3363450 |
| Hg | -1.5312370 | -0.0009390 | 3.5517280 |
| C  | -3.1160360 | -0.0024880 | 4.9223830 |
| F  | -2.6955310 | -0.2422630 | 6.1713440 |
| F  | -4.0273330 | -0.9395310 | 4.6311360 |
| F  | -3.7595580 | 1.1716150  | 4.9467090 |
| N  | 2.4161850  | 0.0011710  | 3.9579660 |
| N  | 3.1152680  | 0.0015950  | 2.9616310 |
| N  | 1.7732350  | -0.0960990 | 4.8744620 |
| Hg | 3.7287940  | 1.7368240  | 2.0859790 |
| C  | 4.4342520  | 3.4343190  | 1.0804310 |
| F  | 5.3663550  | 3.1237300  | 0.1699700 |
| F  | 4.9886570  | 4.3178810  | 1.9202460 |
| F  | 3.4545600  | 4.0764080  | 0.4314660 |

**3b**

|    |            |            |            |
|----|------------|------------|------------|
| N  | 0.0000000  | 0.0000000  | 0.0000000  |
| N  | 0.0000000  | 0.0000000  | 1.2171280  |
| N  | 0.0968810  | 0.0000000  | 2.3366930  |
| Hg | -1.7348580 | 0.0009390  | -1.0698000 |
| C  | -3.4319240 | 0.0024880  | -2.2987230 |
| F  | -3.1206600 | 0.2422630  | -3.5792860 |
| F  | -4.3147190 | 0.9395310  | -1.9299950 |
| F  | -4.0751460 | -1.1716150 | -2.2674780 |
| N  | 0.0497490  | 0.0002120  | 5.7997540  |
| N  | 1.2667640  | -0.0005310 | 5.8163180  |
| N  | 2.3862830  | 0.0956670  | 5.8316010  |
| Hg | -1.0210120 | -1.7339930 | 5.7852870  |
| C  | -2.2508660 | -3.4303090 | 5.7692830  |
| F  | -3.5343860 | -3.1183790 | 5.9917610  |
| F  | -1.8954580 | -4.3137790 | 6.7108260  |
| F  | -2.2040350 | -4.0729860 | 4.5954000  |

**4a**

|    |            |            |            |
|----|------------|------------|------------|
| N  | 0.0000000  | 0.0000000  | 0.0000000  |
| N  | 0.0000000  | 0.0000000  | 1.2171280  |
| N  | 0.0968810  | 0.0000000  | 2.3366930  |
| Hg | -1.7348580 | 0.0009390  | -1.0698000 |
| C  | -3.4319240 | 0.0024880  | -2.2987230 |
| F  | -3.1206600 | 0.2422630  | -3.5792860 |
| F  | -4.3147190 | 0.9395310  | -1.9299950 |
| F  | -4.0751460 | -1.1716150 | -2.2674780 |
| N  | 3.0418740  | -0.0016470 | 1.0857600  |
| N  | 2.9900630  | 1.2143760  | 1.0879410  |
| N  | 2.9928270  | -1.1243220 | 1.0878780  |
| Hg | 4.6761920  | 2.3571200  | 1.0150690  |
| C  | 6.3177980  | 3.6572310  | 0.9434820  |
| F  | 5.9423730  | 4.9233650  | 0.7194690  |
| F  | 7.1747630  | 3.3264290  | -0.0309490 |
| F  | 7.0112070  | 3.6534480  | 2.0890820  |

**4b**

|    |            |            |            |
|----|------------|------------|------------|
| N  | 0.0000000  | 0.0000000  | 0.0000000  |
| N  | 0.0000000  | 0.0000000  | 1.2171280  |
| N  | 0.0968810  | 0.0000000  | 2.3366930  |
| Hg | -1.7348580 | 0.0009390  | -1.0698000 |
| C  | -3.4319240 | 0.0024880  | -2.2987230 |
| F  | -3.1206600 | 0.2422630  | -3.5792860 |
| F  | -4.3147190 | 0.9395310  | -1.9299950 |
| F  | -4.0751460 | -1.1716150 | -2.2674780 |
| N  | 2.9331320  | -0.0015880 | 1.0904560  |
| N  | 2.9315500  | 1.2144050  | 1.0379330  |
| N  | 2.9304610  | -1.1242910 | 1.0420670  |
| Hg | 3.0049830  | 2.3581010  | 2.7233920  |
| C  | 3.0772090  | 3.6591390  | 4.3642360  |
| F  | 3.3018460  | 4.9249420  | 3.9880690  |
| F  | 4.0514770  | 3.3283590  | 5.2213960  |
| F  | 1.9316070  | 3.6563260  | 5.0576460  |

**5a**

|    |            |            |            |
|----|------------|------------|------------|
| N  | 0.0000000  | 0.0000000  | 0.0000000  |
| N  | 0.0000000  | 0.0000000  | 1.2171280  |
| N  | 0.0968810  | 0.0000000  | 2.3366930  |
| Hg | -1.7348580 | 0.0009390  | -1.0698000 |
| C  | -3.4319240 | 0.0024880  | -2.2987230 |
| F  | -3.1206600 | 0.2422630  | -3.5792860 |
| F  | -4.3147190 | 0.9395310  | -1.9299950 |
| F  | -4.0751460 | -1.1716150 | -2.2674780 |
| N  | 0.1876480  | 0.0001070  | 5.4073740  |
| N  | -1.0293670 | 0.0008570  | 5.3908110  |

|    |            |            |           |
|----|------------|------------|-----------|
| N  | 1.3084270  | -0.0005300 | 5.3257380 |
| Hg | -2.1226770 | 0.0014990  | 7.1109490 |
| C  | -3.3745800 | 0.0028680  | 8.7911350 |
| F  | -4.6506430 | 0.2436050  | 8.4626070 |
| F  | -3.0173310 | 0.9391960  | 9.6793910 |
| F  | -3.3528070 | -1.1716080 | 9.4340650 |

**5b**

|    |            |            |            |
|----|------------|------------|------------|
| N  | 0.0000000  | 0.0000000  | 0.0000000  |
| N  | 0.0000000  | 0.0000000  | 1.2171280  |
| N  | 0.0968810  | 0.0000000  | 2.3366930  |
| Hg | -1.7348580 | 0.0009390  | -1.0698000 |
| C  | -3.4319240 | 0.0024880  | -2.2987230 |
| F  | -3.1206600 | 0.2422630  | -3.5792860 |
| F  | -4.3147190 | 0.9395310  | -1.9299950 |
| F  | -4.0751460 | -1.1716150 | -2.2674780 |
| N  | 0.3195400  | 0.0000260  | 5.3924600  |
| N  | -0.8897830 | 0.1057000  | 5.4806090  |
| N  | 1.4403190  | -0.0006640 | 5.3108240  |
| Hg | -2.1029590 | -1.5297230 | 5.5689240  |
| C  | -3.4709180 | -3.1136820 | 5.6691560  |
| F  | -4.6988850 | -2.6925560 | 5.9992650  |
| F  | -3.1129670 | -4.0257240 | 6.5820560  |
| F  | -3.5808950 | -3.7564770 | 4.4995630  |

**6a**

|    |            |            |            |
|----|------------|------------|------------|
| N  | 0.0000000  | 0.0000000  | 0.0000000  |
| N  | 0.0000000  | 0.0000000  | 1.2171280  |
| N  | 0.0968810  | 0.0000000  | 2.3366930  |
| Hg | -1.7348580 | 0.0009390  | -1.0698000 |
| C  | -3.4319240 | 0.0024880  | -2.2987230 |
| F  | -3.1206600 | 0.2422630  | -3.5792860 |
| F  | -4.3147190 | 0.9395310  | -1.9299950 |
| F  | -4.0751460 | -1.1716150 | -2.2674780 |
| N  | 3.2235140  | -0.0019250 | 2.0661310  |
| N  | 3.3203950  | -0.0019250 | 3.1856960  |
| N  | 3.3203950  | -0.0017960 | 4.4028240  |
| Hg | 5.0552530  | -0.0028600 | 5.4726240  |
| C  | 6.7523190  | -0.0032520 | 6.7015460  |
| F  | 6.4413480  | 0.2370380  | 7.9820850  |
| F  | 7.6362570  | 0.9326740  | 6.3327200  |
| F  | 7.3941090  | -1.1781420 | 6.6704260  |

**6b**

|   |           |           |           |
|---|-----------|-----------|-----------|
| N | 0.0000000 | 0.0000000 | 0.0000000 |
| N | 0.0000000 | 0.0000000 | 1.2171280 |
| N | 0.0968810 | 0.0000000 | 2.3366930 |

|    |            |            |            |
|----|------------|------------|------------|
| Hg | -1.7348580 | 0.0009390  | -1.0698000 |
| C  | -3.4319240 | 0.0024880  | -2.2987230 |
| F  | -3.1206600 | 0.2422630  | -3.5792860 |
| F  | -4.3147190 | 0.9395310  | -1.9299950 |
| F  | -4.0751460 | -1.1716150 | -2.2674780 |
| N  | 3.2182670  | -0.0019220 | 2.0665850  |
| N  | 3.3151480  | -0.0019220 | 3.1861500  |
| N  | 3.4198160  | 0.1030100  | 4.3942200  |
| Hg | 3.5298840  | -1.5331520 | 5.6046190  |
| C  | 3.6538690  | -3.1179420 | 6.9696660  |
| F  | 3.9997950  | -2.6968550 | 8.1932840  |
| F  | 4.5644040  | -4.0269560 | 6.5982400  |
| F  | 2.4878390  | -3.7643190 | 7.0953570  |

### 7a

|    |            |            |            |
|----|------------|------------|------------|
| N  | 0.0000000  | 0.0000000  | 0.0000000  |
| N  | 0.0000000  | 0.0000000  | 1.2171280  |
| N  | 0.0968810  | 0.0000000  | 2.3366930  |
| Hg | -1.7348580 | 0.0009390  | -1.0698000 |
| C  | -3.4319240 | 0.0024880  | -2.2987230 |
| F  | -3.1206600 | 0.2422630  | -3.5792860 |
| F  | -4.3147190 | 0.9395310  | -1.9299950 |
| F  | -4.0751460 | -1.1716150 | -2.2674780 |
| N  | 3.1612120  | -0.0017110 | 0.0000000  |
| N  | 3.1612120  | -0.0017110 | 1.2171280  |
| N  | 3.0643310  | -0.0016070 | -1.1195650 |
| Hg | 4.8960690  | -0.0026510 | 2.2869280  |
| C  | 6.5931360  | -0.0029390 | 3.5158510  |
| F  | 6.2821320  | 0.2371730  | 4.7964150  |
| F  | 7.4769450  | 0.9331470  | 3.1471230  |
| F  | 7.2350870  | -1.1777380 | 3.4846060  |

### 7b

|    |            |            |            |
|----|------------|------------|------------|
| N  | 0.0000000  | 0.0000000  | 0.0000000  |
| N  | 0.0000000  | 0.0000000  | 1.2171280  |
| N  | 0.0968810  | 0.0000000  | 2.3366930  |
| Hg | -1.7348580 | 0.0009390  | -1.0698000 |
| C  | -3.4319240 | 0.0024880  | -2.2987230 |
| F  | -3.1206600 | 0.2422630  | -3.5792860 |
| F  | -4.3147190 | 0.9395310  | -1.9299950 |
| F  | -4.0751460 | -1.1716150 | -2.2674780 |
| N  | 3.0667150  | -0.0016600 | 0.0000000  |
| N  | 3.0667140  | -0.0016600 | 1.2171280  |
| N  | 3.0668190  | 0.0952200  | -1.1195650 |
| Hg | 3.0657750  | -1.7365180 | 2.2869280  |
| C  | 3.0654860  | -3.4335850 | 3.5158510  |
| F  | 3.3055990  | -3.1225810 | 4.7964140  |
| F  | 4.0015730  | -4.3173940 | 3.1471230  |

|   |           |            |           |
|---|-----------|------------|-----------|
| F | 1.8906880 | -4.0755350 | 3.4846060 |
|---|-----------|------------|-----------|

**8b**

|    |            |            |            |
|----|------------|------------|------------|
| N  | 0.0000000  | 0.0000000  | 0.0000000  |
| N  | 0.0000000  | 0.0000000  | 1.2171280  |
| N  | 0.0968810  | 0.0000000  | 2.3366930  |
| Hg | -1.7348580 | 0.0009390  | -1.0698000 |
| C  | -3.4319240 | 0.0024880  | -2.2987230 |
| F  | -3.1206600 | 0.2422630  | -3.5792860 |
| F  | -4.3147190 | 0.9395310  | -1.9299950 |
| F  | -4.0751460 | -1.1716150 | -2.2674780 |
| N  | 3.7706180  | -0.0887440 | 0.9358550  |
| N  | 3.8215330  | -0.0545680 | 2.1514380  |
| N  | 3.7251170  | -0.0233480 | -0.1850660 |
| Hg | 3.8433540  | -1.7585230 | 3.2695900  |
| C  | 3.8729600  | -3.4202470 | 4.5455540  |
| F  | 4.1703550  | -3.0767660 | 5.8056330  |
| F  | 4.7815230  | -4.3269490 | 4.1637940  |
| F  | 2.6898390  | -4.0464790 | 4.5814320  |

**9b**

|    |            |            |            |
|----|------------|------------|------------|
| N  | 0.0000000  | 0.0000000  | 0.0000000  |
| N  | 0.0000000  | 0.0000000  | 1.2171280  |
| N  | 0.0968810  | 0.0000000  | 2.3366930  |
| Hg | -1.7348580 | 0.0009390  | -1.0698000 |
| C  | -3.4319240 | 0.0024880  | -2.2987230 |
| F  | -3.1206600 | 0.2422630  | -3.5792860 |
| F  | -4.3147190 | 0.9395310  | -1.9299950 |
| F  | -4.0751460 | -1.1716150 | -2.2674780 |
| N  | 3.1417300  | -0.0019340 | 0.9452600  |
| N  | 3.2386110  | -0.0019340 | 2.0648250  |
| N  | 3.3432800  | 0.1029970  | 3.2728950  |
| Hg | 3.4469970  | -1.5331710 | 4.4838450  |
| C  | 3.5647700  | -3.1179710 | 5.8494310  |
| F  | 3.9118420  | -2.6977610 | 7.0730260  |
| F  | 4.4721010  | -4.0304170 | 5.4785810  |
| F  | 2.3963500  | -3.7600520 | 5.9749560  |

**Table S2.** Cartesian coordinates of dimers of  $[\text{N}_3\text{-Hg}(\text{CF}_3)]$  optimized in water with different topologies and torsion angles  $\tau$ .

**1a**

|    |            |            |           |
|----|------------|------------|-----------|
| N  | 0.0000000  | 0.0000000  | 0.0000000 |
| N  | 0.0000000  | 0.0000000  | 1.1237490 |
| N  | 0.1049310  | 0.0000000  | 2.3363450 |
| Hg | -1.5312370 | -0.0009390 | 3.5517280 |

|    |            |            |            |
|----|------------|------------|------------|
| C  | -3.1160370 | -0.0024880 | 4.9223830  |
| F  | -2.6955320 | -0.2422630 | 6.1713440  |
| F  | -4.0273340 | -0.9395310 | 4.6311360  |
| F  | -3.7595580 | 1.1716150  | 4.9467080  |
| N  | 4.0691430  | 0.0021540  | 1.9933040  |
| N  | 4.1740750  | 0.0021540  | 3.2059010  |
| N  | 4.1740750  | 0.0020490  | 4.3296490  |
| Hg | 5.7053120  | 0.0030930  | 0.7779210  |
| C  | 7.2901120  | 0.0033820  | -0.5927340 |
| F  | 6.8698660  | -0.2367300 | -1.8417170 |
| F  | 8.2024190  | -0.9327050 | -0.3015740 |
| F  | 7.9323660  | 1.1781810  | -0.6169500 |

**1b**

|    |            |            |            |
|----|------------|------------|------------|
| N  | 0.0000000  | 0.0000000  | 0.0000000  |
| N  | 0.0000000  | 0.0000000  | 1.1237490  |
| N  | 0.1049310  | 0.0000000  | 2.3363450  |
| Hg | -1.5312370 | -0.0009390 | 3.5517280  |
| C  | -3.1160370 | -0.0024880 | 4.9223830  |
| F  | -2.6955320 | -0.2422630 | 6.1713440  |
| F  | -4.0273340 | -0.9395310 | 4.6311360  |
| F  | -3.7595580 | 1.1716150  | 4.9467080  |
| N  | 4.0131480  | 0.0021240  | 1.9981500  |
| N  | 4.1180790  | 0.0021240  | 3.2107460  |
| N  | 4.2147040  | -0.0947570 | 4.3261330  |
| Hg | 3.9199820  | 1.7369810  | 0.9324140  |
| C  | 3.8137460  | 3.4340480  | -0.2919080 |
| F  | 3.9425640  | 3.1230440  | -1.5884050 |
| F  | 4.7781370  | 4.3178570  | -0.0052560 |
| F  | 2.6460150  | 4.0759990  | -0.1594980 |

**2a**

|    |            |            |           |
|----|------------|------------|-----------|
| N  | 0.0000000  | 0.0000000  | 0.0000000 |
| N  | 0.0000000  | 0.0000000  | 1.1237490 |
| N  | 0.1049310  | 0.0000000  | 2.3363450 |
| Hg | -1.5312370 | -0.0009390 | 3.5517280 |
| C  | -3.1160370 | -0.0024880 | 4.9223830 |
| F  | -2.6955310 | -0.2422630 | 6.1713440 |
| F  | -4.0273340 | -0.9395310 | 4.6311360 |
| F  | -3.7595580 | 1.1716150  | 4.9467080 |
| N  | 3.2880590  | 0.0016130  | 4.5696910 |
| N  | 3.9434790  | 0.0020140  | 3.5441060 |
| N  | 2.6035420  | 0.0011490  | 5.4608970 |
| Hg | 5.9814010  | 0.0031120  | 3.5768790 |
| C  | 8.0731670  | 0.0036160  | 3.4552210 |
| F  | 8.5007070  | -0.2360390 | 2.2086270 |
| F  | 8.6194080  | -0.9326910 | 4.2415330 |
| F  | 8.5971700  | 1.1783320  | 3.8276340 |



**2b**

|    |            |            |           |
|----|------------|------------|-----------|
| N  | 0.0000000  | 0.0000000  | 0.0000000 |
| N  | 0.0000000  | 0.0000000  | 1.1237490 |
| N  | 0.1049310  | 0.0000000  | 2.3363450 |
| Hg | -1.5312370 | -0.0009390 | 3.5517280 |
| C  | -3.1160360 | -0.0024880 | 4.9223830 |
| F  | -2.6955310 | -0.2422630 | 6.1713440 |
| F  | -4.0273330 | -0.9395310 | 4.6311360 |
| F  | -3.7595580 | 1.1716150  | 4.9467090 |
| N  | 2.7515360  | 0.0013410  | 4.1932550 |
| N  | 3.4506190  | 0.0017640  | 3.1969200 |
| N  | 2.1085850  | -0.0959300 | 5.1097510 |
| Hg | 4.0641450  | 1.7369940  | 2.3212680 |
| C  | 4.7696030  | 3.4344890  | 1.3157190 |
| F  | 5.7017060  | 3.1239000  | 0.4052580 |
| F  | 5.3240080  | 4.3180510  | 2.1555350 |
| F  | 3.7899110  | 4.0765770  | 0.6667550 |

**3b**

|    |            |            |            |
|----|------------|------------|------------|
| N  | 0.0000000  | 0.0000000  | 0.0000000  |
| N  | 0.0000000  | 0.0000000  | 1.2171280  |
| N  | 0.0968810  | 0.0000000  | 2.3366930  |
| Hg | -1.7348580 | 0.0009390  | -1.0698000 |
| C  | -3.4319240 | 0.0024880  | -2.2987230 |
| F  | -3.1206600 | 0.2422630  | -3.5792860 |
| F  | -4.3147190 | 0.9395310  | -1.9299950 |
| F  | -4.0751460 | -1.1716150 | -2.2674780 |
| N  | 0.0418960  | 0.0002470  | 6.3767800  |
| N  | 1.2589110  | -0.0004960 | 6.3933430  |
| N  | 2.3784300  | 0.0957020  | 6.4086270  |
| Hg | -1.0288650 | -1.7339570 | 6.3623130  |
| C  | -2.2587200 | -3.4302740 | 6.3463090  |
| F  | -3.5422400 | -3.1183440 | 6.5687870  |
| F  | -1.9033120 | -4.3137430 | 7.2878520  |
| F  | -2.2118880 | -4.0729510 | 5.1724260  |

**4a**

|    |            |            |            |
|----|------------|------------|------------|
| N  | 0.0000000  | 0.0000000  | 0.0000000  |
| N  | 0.0000000  | 0.0000000  | 1.2171280  |
| N  | 0.0968810  | 0.0000000  | 2.3366930  |
| Hg | -1.7348580 | 0.0009390  | -1.0698000 |
| C  | -3.4319240 | 0.0024880  | -2.2987230 |
| F  | -3.1206600 | 0.2422630  | -3.5792860 |
| F  | -4.3147190 | 0.9395310  | -1.9299950 |
| F  | -4.0751460 | -1.1716150 | -2.2674780 |
| N  | 3.0809460  | -0.0016680 | 1.0840730  |

|    |           |            |            |
|----|-----------|------------|------------|
| N  | 3.0291350 | 1.2143550  | 1.0862530  |
| N  | 3.0318990 | -1.1243440 | 1.0861910  |
| Hg | 4.7152640 | 2.3570990  | 1.0133820  |
| C  | 6.3568710 | 3.6572100  | 0.9417950  |
| F  | 5.9814450 | 4.9233440  | 0.7177820  |
| F  | 7.2138350 | 3.3264080  | -0.0326370 |
| F  | 7.0502790 | 3.6534270  | 2.0873950  |

**4b**

|    |            |            |            |
|----|------------|------------|------------|
| N  | 0.0000000  | 0.0000000  | 0.0000000  |
| N  | 0.0000000  | 0.0000000  | 1.2171280  |
| N  | 0.0968810  | 0.0000000  | 2.3366930  |
| Hg | -1.7348580 | 0.0009390  | -1.0698000 |
| C  | -3.4319240 | 0.0024880  | -2.2987230 |
| F  | -3.1206600 | 0.2422630  | -3.5792860 |
| F  | -4.3147190 | 0.9395310  | -1.9299950 |
| F  | -4.0751460 | -1.1716150 | -2.2674780 |
| N  | 3.0453890  | -0.0016490 | 1.0856080  |
| N  | 3.0438070  | 1.2143440  | 1.0330850  |
| N  | 3.0427180  | -1.1243520 | 1.0372190  |
| Hg | 3.1172400  | 2.3580400  | 2.7185440  |
| C  | 3.1894660  | 3.6590780  | 4.3593880  |
| F  | 3.4141030  | 4.9248810  | 3.9832210  |
| F  | 4.1637340  | 3.3282980  | 5.2165480  |
| F  | 2.0438640  | 3.6562650  | 5.0527980  |

**5a**

|    |            |            |            |
|----|------------|------------|------------|
| N  | 0.0000000  | 0.0000000  | 0.0000000  |
| N  | 0.0000000  | 0.0000000  | 1.2171280  |
| N  | 0.0968810  | 0.0000000  | 2.3366930  |
| Hg | -1.7348580 | 0.0009390  | -1.0698000 |
| C  | -3.4319240 | 0.0024880  | -2.2987230 |
| F  | -3.1206600 | 0.2422630  | -3.5792860 |
| F  | -4.3147190 | 0.9395310  | -1.9299950 |
| F  | -4.0751460 | -1.1716150 | -2.2674780 |
| N  | 0.2117290  | 0.0001350  | 6.2220500  |
| N  | -1.0052860 | 0.0008860  | 6.2054870  |
| N  | 1.3325080  | -0.0005010 | 6.1404140  |
| Hg | -2.0985960 | 0.0015270  | 7.9256250  |
| C  | -3.3504990 | 0.0028970  | 9.6058110  |
| F  | -4.6265620 | 0.2436330  | 9.2772830  |
| F  | -2.9932490 | 0.9392250  | 10.4940670 |
| F  | -3.3287260 | -1.1715800 | 10.2487410 |

**5b**

|   |           |           |           |
|---|-----------|-----------|-----------|
| N | 0.0000000 | 0.0000000 | 0.0000000 |
| N | 0.0000000 | 0.0000000 | 1.2171280 |

|    |            |            |            |
|----|------------|------------|------------|
| N  | 0.0968810  | 0.0000000  | 2.3366930  |
| Hg | -1.7348580 | 0.0009390  | -1.0698000 |
| C  | -3.4319240 | 0.0024880  | -2.2987230 |
| F  | -3.1206600 | 0.2422630  | -3.5792860 |
| F  | -4.3147190 | 0.9395310  | -1.9299950 |
| F  | -4.0751460 | -1.1716150 | -2.2674780 |
| N  | 0.3747500  | 0.0000320  | 6.1501540  |
| N  | -0.8345730 | 0.1057070  | 6.2383030  |
| N  | 1.4955290  | -0.0006570 | 6.0685180  |
| Hg | -2.0477490 | -1.5297160 | 6.3266190  |
| C  | -3.4157090 | -3.1136750 | 6.4268500  |
| F  | -4.6436750 | -2.6925500 | 6.7569590  |
| F  | -3.0577570 | -4.0257180 | 7.3397500  |
| F  | -3.5256860 | -3.7564710 | 5.2572570  |

**6a**

|    |            |            |            |
|----|------------|------------|------------|
| N  | 0.0000000  | 0.0000000  | 0.0000000  |
| N  | 0.0000000  | 0.0000000  | 1.2171280  |
| N  | 0.0968810  | 0.0000000  | 2.3366930  |
| Hg | -1.7348580 | 0.0009390  | -1.0698000 |
| C  | -3.4319240 | 0.0024880  | -2.2987230 |
| F  | -3.1206600 | 0.2422630  | -3.5792860 |
| F  | -4.3147190 | 0.9395310  | -1.9299950 |
| F  | -4.0751460 | -1.1716150 | -2.2674780 |
| N  | 3.4343620  | -0.0020550 | 2.0478860  |
| N  | 3.5312430  | -0.0020550 | 3.1674500  |
| N  | 3.5312430  | -0.0019260 | 4.3845780  |
| Hg | 5.2661000  | -0.0029880 | 5.4543780  |
| C  | 6.9631670  | -0.0033780 | 6.6833010  |
| F  | 6.6521960  | 0.2369120  | 7.9638390  |
| F  | 7.8471040  | 0.9325490  | 6.3144750  |
| F  | 7.6049580  | -1.1782670 | 6.6521810  |

**6b**

|    |            |            |            |
|----|------------|------------|------------|
| N  | 0.0000000  | 0.0000000  | 0.0000000  |
| N  | 0.0000000  | 0.0000000  | 1.2171280  |
| N  | 0.0968810  | 0.0000000  | 2.3366930  |
| Hg | -1.7348580 | 0.0009390  | -1.0698000 |
| C  | -3.4319240 | 0.0024880  | -2.2987230 |
| F  | -3.1206600 | 0.2422630  | -3.5792860 |
| F  | -4.3147190 | 0.9395310  | -1.9299950 |
| F  | -4.0751460 | -1.1716150 | -2.2674780 |
| N  | 3.4736020  | -0.0020790 | 2.0444900  |
| N  | 3.5704830  | -0.0020790 | 3.1640550  |
| N  | 3.6751520  | 0.1028520  | 4.3721250  |
| Hg | 3.7892570  | -1.5332920 | 5.5821730  |
| C  | 3.9171920  | -3.1180650 | 6.9468760  |
| F  | 4.2623870  | -2.6964220 | 8.1705090  |

|   |           |            |           |
|---|-----------|------------|-----------|
| F | 4.8297570 | -4.0248900 | 6.5750840 |
| F | 2.7526890 | -3.7671690 | 7.0726710 |

**7a**

|    |            |            |            |
|----|------------|------------|------------|
| N  | 0.0000000  | 0.0000000  | 0.0000000  |
| N  | 0.0000000  | 0.0000000  | 1.2171280  |
| N  | 0.0968810  | 0.0000000  | 2.3366930  |
| Hg | -1.7348580 | 0.0009390  | -1.0698000 |
| C  | -3.4319240 | 0.0024880  | -2.2987230 |
| F  | -3.1206600 | 0.2422630  | -3.5792860 |
| F  | -4.3147190 | 0.9395310  | -1.9299950 |
| F  | -4.0751460 | -1.1716150 | -2.2674780 |
| N  | 3.9498140  | -0.0021380 | 0.0000000  |
| N  | 3.9498140  | -0.0021380 | 1.2171280  |
| N  | 3.8529330  | -0.0020340 | -1.1195650 |
| Hg | 5.6846720  | -0.0030780 | 2.2869280  |
| C  | 7.3817380  | -0.0033660 | 3.5158510  |
| F  | 7.0707340  | 0.2367460  | 4.7964150  |
| F  | 8.2655480  | 0.9327200  | 3.1471230  |
| F  | 8.0236890  | -1.1781650 | 3.4846060  |

**7b**

|    |            |            |            |
|----|------------|------------|------------|
| N  | 0.0000000  | 0.0000000  | 0.0000000  |
| N  | 0.0000000  | 0.0000000  | 1.2171280  |
| N  | 0.0968810  | 0.0000000  | 2.3366930  |
| Hg | -1.7348580 | 0.0009390  | -1.0698000 |
| C  | -3.4319240 | 0.0024880  | -2.2987230 |
| F  | -3.1206600 | 0.2422630  | -3.5792860 |
| F  | -4.3147190 | 0.9395310  | -1.9299950 |
| F  | -4.0751460 | -1.1716150 | -2.2674780 |
| N  | 3.2791130  | -0.0017750 | 0.0000000  |
| N  | 3.2791130  | -0.0017750 | 1.2171280  |
| N  | 3.2792180  | 0.0951050  | -1.1195650 |
| Hg | 3.2781740  | -1.7366330 | 2.2869280  |
| C  | 3.2778850  | -3.4337000 | 3.5158510  |
| F  | 3.5179970  | -3.1226960 | 4.7964140  |
| F  | 4.2139720  | -4.3175090 | 3.1471230  |
| F  | 2.1030860  | -4.0756500 | 3.4846060  |

**8b**

|    |            |           |            |
|----|------------|-----------|------------|
| N  | 0.0000000  | 0.0000000 | 0.0000000  |
| N  | 0.0000000  | 0.0000000 | 1.2171280  |
| N  | 0.0968810  | 0.0000000 | 2.3366930  |
| Hg | -1.7348580 | 0.0009390 | -1.0698000 |
| C  | -3.4319240 | 0.0024880 | -2.2987230 |
| F  | -3.1206600 | 0.2422630 | -3.5792860 |
| F  | -4.3147190 | 0.9395310 | -1.9299950 |

|    |            |            |            |
|----|------------|------------|------------|
| F  | -4.0751460 | -1.1716150 | -2.2674780 |
| N  | 4.0577170  | -0.0955010 | 0.9144390  |
| N  | 4.1086320  | -0.0613250 | 2.1300210  |
| N  | 4.0122730  | -0.0301060 | -0.2064840 |
| Hg | 4.1294410  | -1.7652650 | 3.2482160  |
| C  | 4.1580580  | -3.4269750 | 4.5242210  |
| F  | 4.4556320  | -3.0836370 | 5.7842960  |
| F  | 5.0660980  | -4.3342160 | 4.1424980  |
| F  | 2.9745710  | -4.0525160 | 4.5600940  |

### 9b

|    |            |            |            |
|----|------------|------------|------------|
| N  | 0.0000000  | 0.0000000  | 0.0000000  |
| N  | 0.0000000  | 0.0000000  | 1.2171280  |
| N  | 0.0968810  | 0.0000000  | 2.3366930  |
| Hg | -1.7348580 | 0.0009390  | -1.0698000 |
| C  | -3.4319240 | 0.0024880  | -2.2987230 |
| F  | -3.1206600 | 0.2422630  | -3.5792860 |
| F  | -4.3147190 | 0.9395310  | -1.9299950 |
| F  | -4.0751460 | -1.1716150 | -2.2674780 |
| N  | 3.7998320  | -0.0023390 | 0.8883120  |
| N  | 3.8967130  | -0.0023390 | 2.0078760  |
| N  | 4.0013820  | 0.1025920  | 3.2159470  |
| Hg | 4.1050990  | -1.5335770 | 4.4268970  |
| C  | 4.2228720  | -3.1183770 | 5.7924830  |
| F  | 4.5699440  | -2.6981660 | 7.0160780  |
| F  | 5.1302030  | -4.0308220 | 5.4216320  |
| F  | 3.0544520  | -3.7604570 | 5.9180070  |

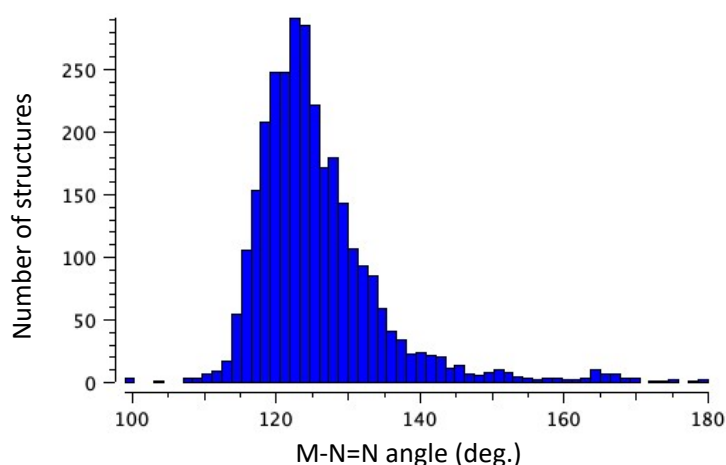

**Figure S1.** Histogram of the distribution of M-N-N angles in azido-containing transition metal complexes as found in the CSD.

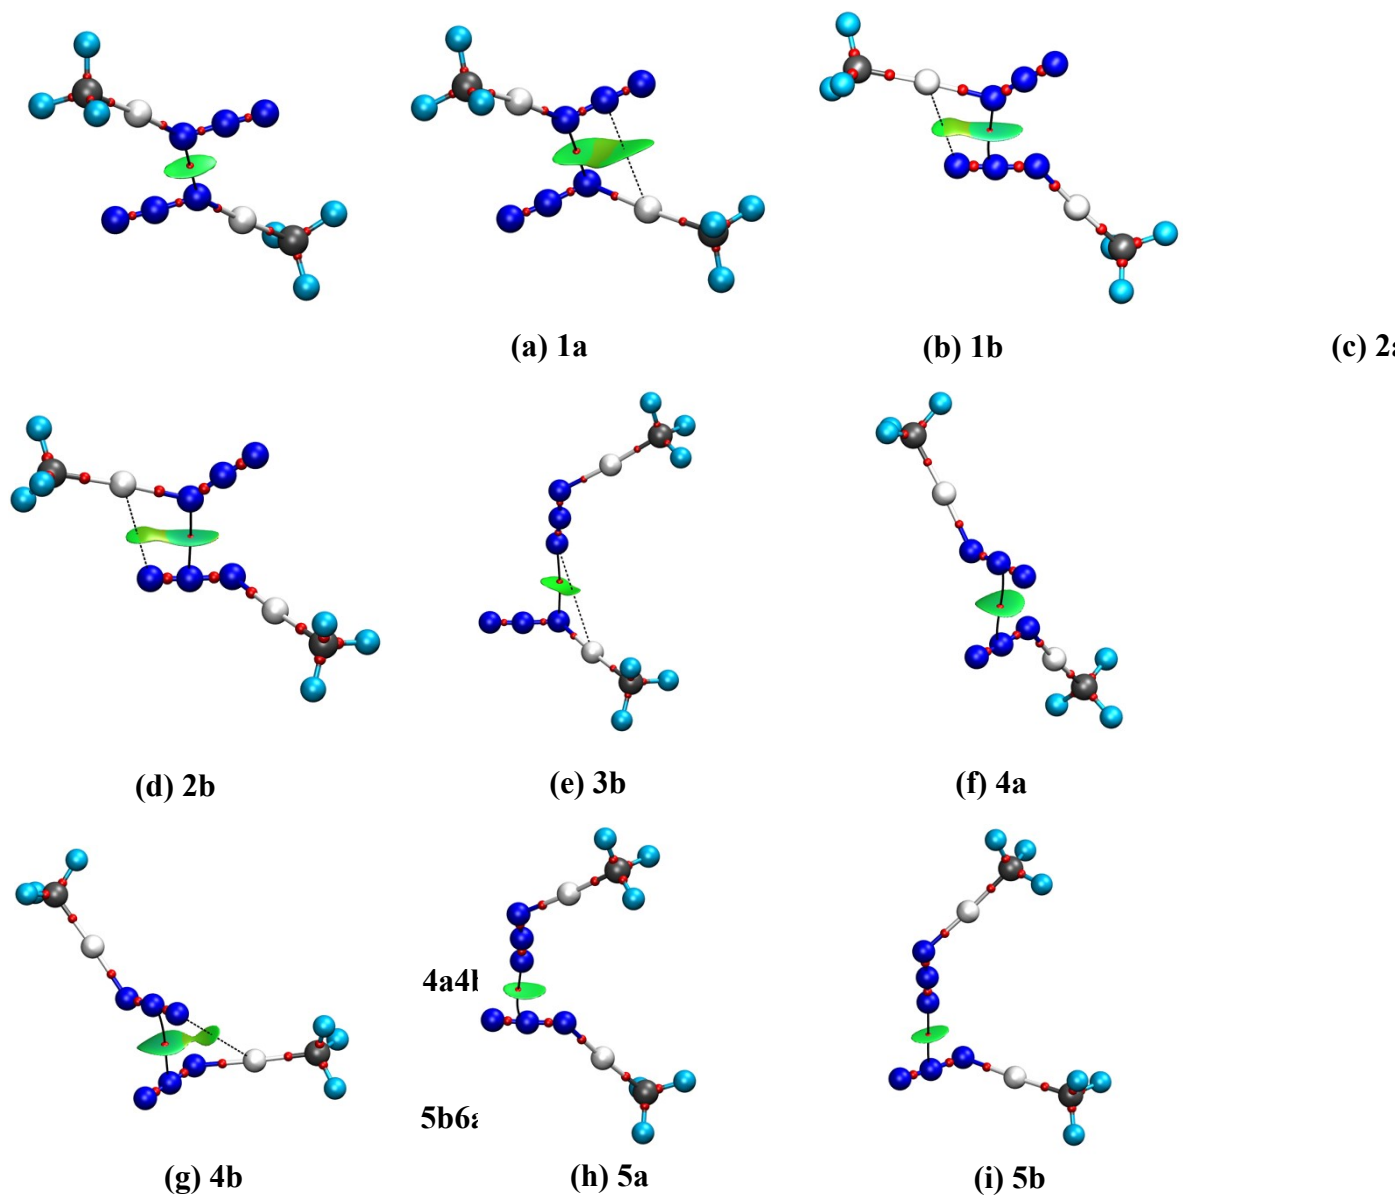

**Figure S2.** Molecular graphs and NCI isosurfaces ( $s = 0.4$ ) of dimers of  $[\text{N}_3\text{-Hg}(\text{CF}_3)]$  with different topologies and torsion angles  $\tau$ . For each topology, model **a** has a dihedral angle  $\tau$  of  $180^\circ$  and model **b** corresponds to  $\tau = 90^\circ$ . The isosurfaces are coloured according to a BRG scheme from  $-0.035 < \text{sign}(\lambda_2)\rho < 0.030$  a.u. Small spheres represent BCPs (red) and RCPs (yellow). The solid lines represent the azido...azido BP and the dashed lines indicate the secondary  $\text{N}\cdots\text{Hg}$  contact.

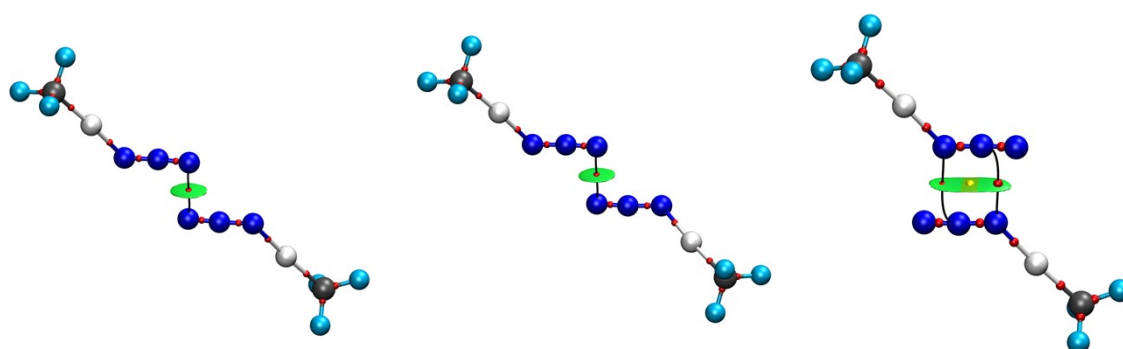

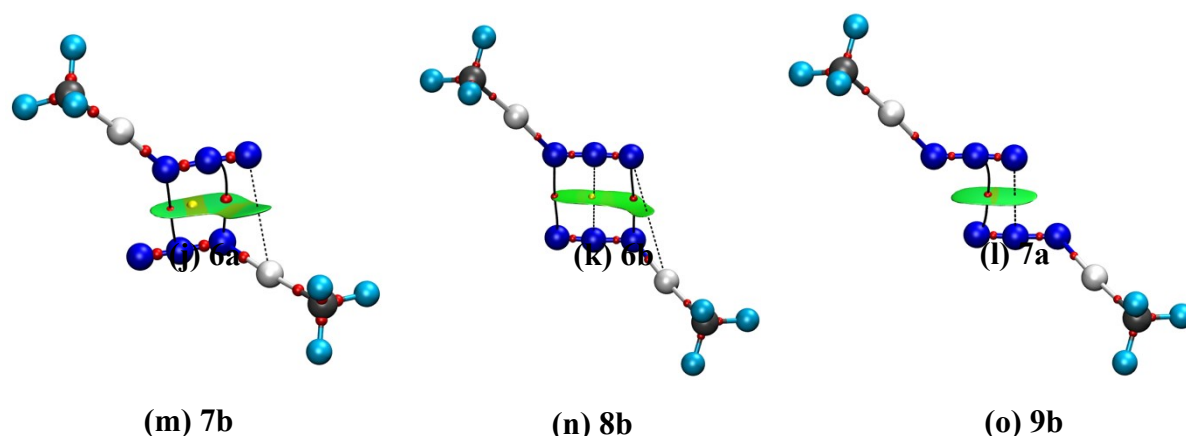

**Figure S3.** Molecular graphs and NCI isosurfaces ( $s = 0.4$ ) of dimers of  $[\text{N}_3\text{-Hg}(\text{CF}_3)]$  with different topologies and torsion angles  $\tau$ . For each topology, model **a** has a dihedral angle  $\tau$  of  $180^\circ$  and model **b** corresponds to  $\tau = 90^\circ$ . The isosurfaces are coloured according to a BRG scheme from  $-0.035 < \text{sign}(\lambda_2)\rho < 0.030$  a.u. Small spheres represent BCPs (red) and RCPs (yellow). The solid lines represent the azido...azido BP and the dashed lines indicate the secondary  $\text{N}\cdots\text{Hg}$  contact. (continuation)

Exponential least-squares fittings equations for Figure 5.

$$\text{a)} \quad \text{Pauli} = 1.58 \cdot e^{(-0.446 \cdot \text{Elec})} \quad (R^2 = 0.65) \quad [\text{Eq. A3.1}]$$

Exponential least-squares fittings equations for Figure 6.

$$\text{a)} \quad \rho_{\text{BCP}} = 0.0047 \cdot e^{(0.032 \cdot \%p_{\text{N}\cdots\text{N}})} \quad (R^2 = 0.85) \quad [\text{Eq. A4.2}]$$

$$\text{b)} \quad \nabla^2 \rho_{\text{BCP}} = 0.0184 \cdot e^{(0.039 \cdot \%p_{\text{N}\cdots\text{N}})} \quad (R^2 = 0.99) \quad [\text{Eq. A4.3}]$$

$$\text{c)} \quad |V_{\text{BCP}}| = 7.44 \cdot e^{(-2.41 \cdot \%p_{\text{N}\cdots\text{N}})} \quad (R^2 = 0.95) \quad [\text{Eq. A4.4}]$$

$$\text{d)} \quad G_{\text{BCP}} = 0.0036 \cdot e^{(0.042 \cdot \%p_{\text{N}\cdots\text{N}})} \quad (R^2 = 0.98) \quad [\text{Eq. A4.5}]$$

**Table S3.** Key geometrical parameters including distances in Å, penetrations (pen.) in % and interaction energies (kcal/mol) for all studied interaction topologies of the  $[\text{N}_3\text{-Hg}(\text{CF}_3)]$  dimers, optimized at the M06-2X/def2-TZVP level in the presence of water as the solvent.

| Compd.    | $\phi$ ( $^\circ$ ) | N contact                              | $\text{N}\cdots\text{N}$ | pen. | N-Hg cont.                       | $\text{N}\cdots\text{Hg}^{ \text{bl} }$ | pen. | $\Delta E_{\text{INT}}$ |
|-----------|---------------------|----------------------------------------|--------------------------|------|----------------------------------|-----------------------------------------|------|-------------------------|
| <b>1a</b> | 180                 | $\text{N}_\alpha\cdots\text{N}_\alpha$ | 3.979                    | -35  |                                  |                                         |      | -0.47                   |
| <b>2a</b> | 180                 | $\text{N}_\alpha\cdots\text{N}_\beta$  | 3.888                    | -30  | $\text{N}_\gamma\cdots\text{Hg}$ | 4.554                                   | -21  | -0.89                   |
| <b>4a</b> | 180                 | $\text{N}_\beta\cdots\text{N}_\beta$   | 3.084                    | 12   |                                  |                                         |      | -0.90                   |
| <b>5a</b> | 180                 | $\text{N}_\gamma\cdots\text{N}_\beta$  | 3.887                    | -30  |                                  |                                         |      | 0.07                    |

|           |     |                                  |       |     |                      |       |     |       |       |
|-----------|-----|----------------------------------|-------|-----|----------------------|-------|-----|-------|-------|
| <b>6a</b> | 180 | N <sub>γ</sub> ···N <sub>γ</sub> | 3.350 | -2  |                      |       |     |       | -0.19 |
| <b>7a</b> | 180 | N <sub>α</sub> ···N <sub>β</sub> | 3.950 | -33 |                      |       |     |       | -0.53 |
|           |     | N <sub>β</sub> ···N <sub>α</sub> | 3.950 | -33 |                      |       |     |       |       |
| <b>1b</b> | 90  | N <sub>α</sub> ···N <sub>α</sub> | 3.923 | -32 | N <sub>β</sub> ···Hg | 4.292 | -9  | -1.22 |       |
| <b>2b</b> | 90  | N <sub>α</sub> ···N <sub>β</sub> | 3.233 | 5   | N <sub>γ</sub> ···Hg | 3.960 | 7   | -2.82 |       |
| <b>3b</b> | 90  | N <sub>γ</sub> ···N <sub>α</sub> | 4.040 | -38 | N <sub>γ</sub> ···Hg | 4.525 | -20 | -0.54 |       |
| <b>4b</b> | 90  | N <sub>β</sub> ···N <sub>β</sub> | 3.048 | 14  | N <sub>γ</sub> ···Hg | 3.851 | 12  | -2.46 |       |
| <b>5b</b> | 90  | N <sub>γ</sub> ···N <sub>β</sub> | 3.824 | -27 | N <sub>γ</sub> ···Hg | 4.781 | -32 | -0.38 |       |
| <b>6b</b> | 90  | N <sub>γ</sub> ···N <sub>γ</sub> | 3.389 | -4  |                      |       |     |       | -0.70 |
| <b>7b</b> | 90  | N <sub>α</sub> ···N <sub>β</sub> | 3.279 | 2   | N <sub>γ</sub> ···Hg | 3.625 | 23  | -2.52 |       |
|           |     | N <sub>β</sub> ···N <sub>α</sub> | 3.279 | 2   |                      |       |     |       |       |
| <b>8b</b> | 90  | N <sub>α</sub> ···N <sub>γ</sub> | 4.018 | -37 | N <sub>γ</sub> ···Hg | 4.495 | -19 | -0.71 |       |
|           |     | N <sub>β</sub> ···N <sub>β</sub> | 4.070 | -39 |                      |       |     |       |       |
|           |     | N <sub>γ</sub> ···N <sub>α</sub> | 4.018 | -37 |                      |       |     |       |       |
| <b>9b</b> | 90  | N <sub>β</sub> ···N <sub>γ</sub> | 3.814 | -26 | N <sub>γ</sub> ···Hg | 4.774 | -32 | -0.65 |       |
|           |     | N <sub>γ</sub> ···N <sub>β</sub> | 3.814 | -26 |                      |       |     |       |       |

**Table S4.** Interaction energies of dimers of [N<sub>3</sub>-Hg(CF<sub>3</sub>)] with different interaction topologies calculated with different functionals.

| Compd.    | Φ (°) | ΔE <sub>INT</sub> |        |         |          |           |         |
|-----------|-------|-------------------|--------|---------|----------|-----------|---------|
|           |       | M062X             | wB97xD | BP86-D3 | B3LYP-D3 | B2PLYP-D3 | PBE0-D3 |
| <b>1a</b> | 180   | -1.12             | -1.74  | -1.73   | -1.95    | -1.95     | -2.11   |
| <b>2a</b> | 180   | -2.74             | -2.88  | -3.13   | -3.34    | -3.42     | -3.48   |
| <b>4a</b> | 180   | -0.91             | -0.97  | -1.06   | -1.33    | -1.37     | -1.47   |
| <b>5a</b> | 180   | -0.10             | -0.12  | -0.08   | -0.43    | -0.55     | -0.60   |
| <b>6a</b> | 180   | -0.21             | -0.33  | -0.39   | -0.65    | -0.70     | -0.76   |
| <b>7a</b> | 180   | -1.08             | -1.38  | -1.28   | -1.63    | -1.78     | -1.93   |
| <b>1b</b> | 90    | -2.20             | -3.31  | -3.80   | -3.77    | -3.40     | -3.64   |
| <b>2b</b> | 90    | -3.71             | -4.37  | -4.48   | -4.59    | -4.38     | -4.67   |
| <b>3b</b> | 90    | -0.63             | -1.19  | -1.04   | -1.26    | -1.21     | -1.38   |
| <b>4b</b> | 90    | -2.52             | -2.68  | -2.95   | -3.10    | -3.05     | -3.20   |
| <b>5b</b> | 90    | -0.59             | -0.93  | -0.87   | -1.18    | -1.17     | -1.29   |
| <b>6b</b> | 90    | -0.75             | -0.95  | -0.96   | -1.26    | -1.28     | -1.37   |
| <b>7b</b> | 90    | -2.71             | -3.21  | -3.54   | -3.67    | -3.59     | -3.79   |
| <b>8b</b> | 90    | -0.75             | -1.57  | -1.47   | -1.63    | -1.60     | -1.91   |
| <b>9b</b> | 90    | -0.89             | -1.22  | -1.29   | -1.53    | -1.60     | -1.73   |

**Table S5.** N···N interatomic distances of dimers of [N<sub>3</sub>-Hg(CF<sub>3</sub>)] with different interaction topologies calculated with different functionals.



| Compd.    | $\Phi$ (°) | N contact                        | N···N (Å) |        |         |          |           |         |
|-----------|------------|----------------------------------|-----------|--------|---------|----------|-----------|---------|
|           |            |                                  | M06-2X    | wB97xD | BP86-D3 | B3LYP-D3 | B2PLYP-D3 | PBE0-D3 |
| <b>1a</b> | 180        | N <sub>α</sub> ···N <sub>α</sub> | 3.062     | 3.098  | 3.021   | 3.045    | 3.010     | 3.028   |
| <b>2a</b> | 180        | N <sub>α</sub> ···N <sub>β</sub> | 2.846     | 2.986  | 2.918   | 2.932    | 2.881     | 2.896   |
| <b>4a</b> | 180        | N <sub>β</sub> ···N <sub>β</sub> | 3.045     | 3.336  | 3.199   | 3.183    | 3.090     | 3.154   |
| <b>5a</b> | 180        | N <sub>γ</sub> ···N <sub>β</sub> | 3.072     | 3.362  | 3.202   | 3.142    | 3.078     | 3.116   |
| <b>6a</b> | 180        | N <sub>γ</sub> ···N <sub>γ</sub> | 3.138     | 3.379  | 3.207   | 3.181    | 3.111     | 3.176   |
| <b>7a</b> | 180        | N <sub>α</sub> ···N <sub>β</sub> | 3.161     | 3.318  | 3.247   | 3.236    | 3.168     | 3.207   |
|           |            | N <sub>β</sub> ···N <sub>α</sub> | 3.161     | 3.318  | 3.247   | 3.236    | 3.168     | 3.207   |
| <b>1b</b> | 90         | N <sub>α</sub> ···N <sub>α</sub> | 3.082     | 3.219  | 3.041   | 3.066    | 3.036     | 3.064   |
| <b>2b</b> | 90         | N <sub>α</sub> ···N <sub>β</sub> | 2.823     | 2.945  | 2.859   | 2.890    | 2.852     | 2.863   |
| <b>3b</b> | 90         | N <sub>γ</sub> ···N <sub>α</sub> | 3.463     | 3.444  | 3.289   | 3.301    | 3.263     | 3.311   |
| <b>4b</b> | 90         | N <sub>β</sub> ···N <sub>β</sub> | 2.936     | 3.148  | 3.055   | 3.062    | 2.997     | 3.044   |
| <b>5b</b> | 90         | N <sub>γ</sub> ···N <sub>β</sub> | 3.064     | 3.245  | 3.118   | 3.109    | 3.067     | 3.100   |
| <b>6b</b> | 90         | N <sub>γ</sub> ···N <sub>γ</sub> | 3.133     | 3.331  | 3.184   | 3.165    | 3.108     | 3.160   |
| <b>7b</b> | 90         | N <sub>α</sub> ···N <sub>β</sub> | 3.067     | 3.264  | 3.147   | 3.157    | 3.107     | 3.134   |
|           |            | N <sub>β</sub> ···N <sub>α</sub> | 3.067     | 3.264  | 3.147   | 3.157    | 3.107     | 3.134   |
| <b>8b</b> | 90         | N <sub>α</sub> ···N <sub>γ</sub> | 3.730     | 3.597  | 3.412   | 3.481    | 3.384     | 3.481   |
|           |            | N <sub>β</sub> ···N <sub>β</sub> | 3.782     | 3.649  | 3.464   | 3.533    | 3.437     | 3.533   |
|           |            | N <sub>γ</sub> ···N <sub>α</sub> | 3.730     | 3.596  | 3.412   | 3.481    | 3.384     | 3.481   |
| <b>9b</b> | 90         | N <sub>β</sub> ···N <sub>γ</sub> | 3.153     | 3.416  | 3.247   | 3.253    | 3.174     | 3.247   |
|           |            | N <sub>γ</sub> ···N <sub>β</sub> | 3.153     | 3.416  | 3.247   | 3.253    | 3.174     | 3.247   |

**Table S6.** N···Hg interatomic distances of dimers of [N<sub>3</sub>-Hg(CF<sub>3</sub>)] with different interaction topologies calculated with different functionals.

| Compd.    | $\Phi$ (°) | N-Hg cont.           | N-Hg (Å) |        |         |          |           |         |
|-----------|------------|----------------------|----------|--------|---------|----------|-----------|---------|
|           |            |                      | M06-2X   | wB97xD | BP86-D3 | B3LYP-D3 | B2PLYP-D3 | PBE0-D3 |
| <b>2a</b> | 180        | N <sub>γ</sub> ···Hg | 3.533    | 3.670  | 3.604   | 3.617    | 3.568     | 3.582   |
| <b>1b</b> | 90         | N <sub>β</sub> ···Hg | 3.540    | 3.659  | 3.505   | 3.525    | 3.500     | 3.524   |

|           |    |                        |       |       |       |       |       |       |
|-----------|----|------------------------|-------|-------|-------|-------|-------|-------|
| <b>2b</b> | 90 | $N_{\gamma} \cdots Hg$ | 3.561 | 3.679 | 3.595 | 3.626 | 3.589 | 3.600 |
| <b>3b</b> | 90 | $N_{\gamma} \cdots Hg$ | 4.019 | 4.002 | 3.869 | 3.880 | 3.847 | 3.888 |
| <b>4b</b> | 90 | $N_{\gamma} \cdots Hg$ | 3.764 | 3.929 | 3.856 | 3.862 | 3.811 | 3.847 |
| <b>5b</b> | 90 | $N_{\gamma} \cdots Hg$ | 4.198 | 4.332 | 4.238 | 4.232 | 4.201 | 4.225 |
| <b>7b</b> | 90 | $N_{\gamma} \cdots Hg$ | 3.440 | 3.611 | 3.509 | 3.518 | 3.474 | 3.498 |
| <b>8b</b> | 90 | $N_{\gamma} \cdots Hg$ | 4.242 | 4.127 | 3.969 | 4.028 | 3.946 | 4.028 |
| <b>9b</b> | 90 | $N_{\gamma} \cdots Hg$ | 4.264 | 4.462 | 4.334 | 4.339 | 4.279 | 4.334 |

---
